# Supplementary material for: Cause-specific mortality in the general population with transient dipstick-proteinuria
Source: PubMed Central journal article supplement (PMC6774516; doi:10.1371/journal.pone.0223005), 2019-10-02
Supplement: pone.0223005.s002.pdf [file pone.0223005.s002.pdf]

## Supplemental Figure 2

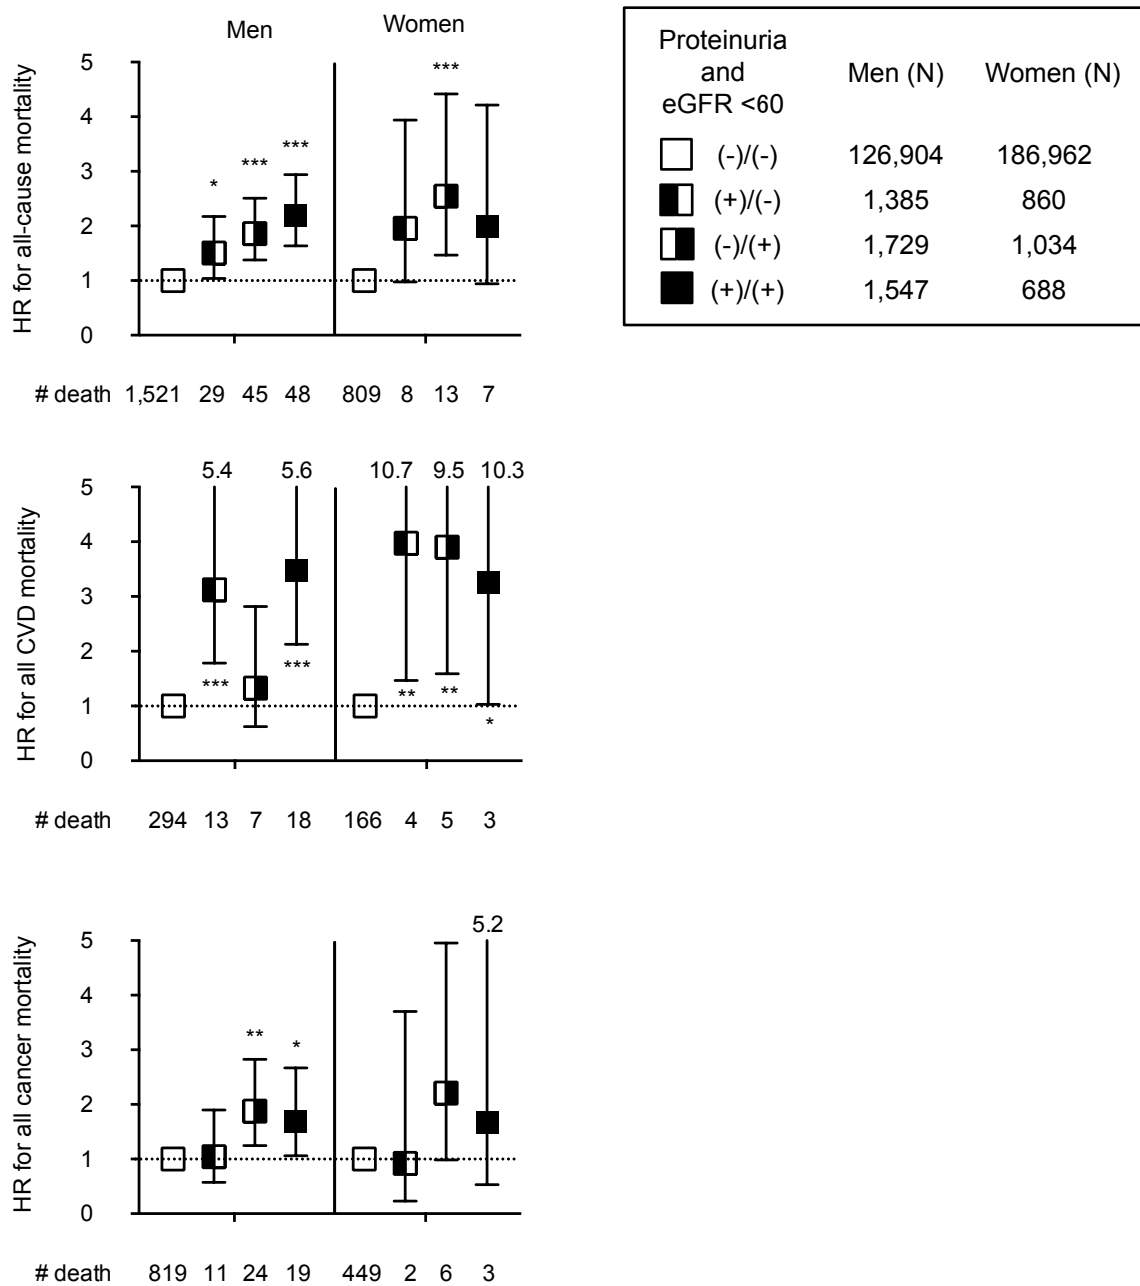

### S2 Fig. Multiple variable-adjusted hazard ratios for all-cause mortality and cause-specific mortality with and without proteinuria and low eGFR

Symbol and error bars indicate multiple variable-adjusted hazard ratios (HRs) and 95% confidence intervals comparing to definitely without proteinuria or Low eGFR less than 60 ml/min/1.73 m<sup>2</sup> (-)/(-) as reference. Analyses were performed by sex, therefore, corresponding variables are similar to **Table 4**, except for sex.

Abbreviations: CVD, cardiovascular diseases. eGFR, estimated glomerular filtration ratio.
